# Supplementary material for: CRISPR/Cas13a-based single-nucleotide polymorphism detection for reliable determination of ABO blood group genotypes
Source: Royal Society of Chemistry journal article supplement (doi:10.1039/d3an02248j), 2024-01-01
Supplement: d3an02248j1.pdf [file d3an02248j1.pdf]

1

## Supporting Information

2 **CRISPR/Cas13a-based single-nucleotide polymorphism detection for**  
3 **reliable determination of ABO blood group genotypes**

4

5 Hongjuan Wei<sup>1</sup>, Liyan Liu<sup>1</sup>, Hanji Jiang, Hong Chen, Yunxiang Wang, Yongjun Han,  
6 Zhen Rong\*, Shengqi Wang\*

7

8 Bioinformatics Center of AMMS, Beijing 100850, P. R. China

9 <sup>1</sup> These authors contributed equally to this work

10

11 Corresponding Author

12 \*(S.Q. Wang) E-mail: [sqwang@bmi.ac.cn](mailto:sqwang@bmi.ac.cn)

13 \*(Z. Rong) E-mail: [rongzhen0525@sina.com](mailto:rongzhen0525@sina.com)

14

15 **Table S1. The sequences of Amplicons, PCR primers and crRNAs**

| DNA                           | Detail of sequences 5'-3'                                                                                                                                                                                                                                                                                                                                                                                                                                                                                                                                                                                                                                                 |
|-------------------------------|---------------------------------------------------------------------------------------------------------------------------------------------------------------------------------------------------------------------------------------------------------------------------------------------------------------------------------------------------------------------------------------------------------------------------------------------------------------------------------------------------------------------------------------------------------------------------------------------------------------------------------------------------------------------------|
| <b>Amplicon of Exon 6-261</b> | <b>GTCGCATTTGCCTCTGGTTGGTTTCCCGGGGAAGGGCGGCTGCCTCTGG<br/>AAGGGTGGTCAGAGGAGGCAGAAGCTGAGTGGAGTTTCCAGGTGGGGGC<br/>GGCCGTGTGCCAGAGGCGCATGTGGGTGGCACCCCTGCCAGCTCCATGTGA<br/>CCGCACGCCTCTCTCCATGTGCAGTAGGAAGGATGTCTCGTGGT<b>N</b>ACCC<br/>CTTGGCTGGCTCCCATTGTCTGGGAGGGCACATTCAACATCGACATCCTC<br/>AACGAGCAGTTCAGGCTCCAGAACCACCATTGGGTAACTGTGTTTGC<br/>CATCAAGAAGTAAGTCAGTGAGGTGGCCGAGGGTAGAGACCCAGGCAGT<br/>GGCGAGTGACTGTGGACATTGAGGTCTCTCCTTGT<b>GTTCAAGACAGAGT<br/>GGGGTG</b></b>                                                                                                                                                                                              |
| <b>ABO-6-T7-F1</b>            | <b>GAAATTAATACGACTCACTATAGGGGTCGCATTTGCCTCTGGTTG</b>                                                                                                                                                                                                                                                                                                                                                                                                                                                                                                                                                                                                                      |
| ABO-6-T7-F2                   | GAAATTAATACGACTCACTATAGGGGGCAGAAGCTGAGTGGAGTT                                                                                                                                                                                                                                                                                                                                                                                                                                                                                                                                                                                                                             |
| ABO-6-T7-F3                   | GAAATTAATACGACTCACTATAGGGTCCAATGTTGAGGGAGGGCT                                                                                                                                                                                                                                                                                                                                                                                                                                                                                                                                                                                                                             |
| ABO-6-T7-F4                   | GAAATTAATACGACTCACTATAGGGGGGAATGATTTGCCCGGTTG                                                                                                                                                                                                                                                                                                                                                                                                                                                                                                                                                                                                                             |
| ABO-6-T7-F5                   | GAAATTAATACGACTCACTATAGGGGTTCCCGCAGGTCCAATGTT                                                                                                                                                                                                                                                                                                                                                                                                                                                                                                                                                                                                                             |
| <b>ABO-6-R1</b>               | <b>CACCCCACTCTGTCTTGAACA</b>                                                                                                                                                                                                                                                                                                                                                                                                                                                                                                                                                                                                                                              |
| ABO-6-R2                      | AATGTCCACAGTCACTCGCC                                                                                                                                                                                                                                                                                                                                                                                                                                                                                                                                                                                                                                                      |
| ABO-6-R3                      | CCCAATGGTGGTGTCTGGA                                                                                                                                                                                                                                                                                                                                                                                                                                                                                                                                                                                                                                                       |
| ABO-6-R4                      | GAGCCTGAACTGCTCGTTGA                                                                                                                                                                                                                                                                                                                                                                                                                                                                                                                                                                                                                                                      |
| ABO-6-R5                      | ACTGCTCGTTGAGGATGTCG                                                                                                                                                                                                                                                                                                                                                                                                                                                                                                                                                                                                                                                      |
| 6-261-G1                      | GT <b>G</b> ACCCCTTGGCTGGCTCCCATTGTCT                                                                                                                                                                                                                                                                                                                                                                                                                                                                                                                                                                                                                                     |
| <b>6-261-G2</b>               | <b>ATGTCCTCGTGGT<b>G</b>ACCCCTTGGCTGGC</b>                                                                                                                                                                                                                                                                                                                                                                                                                                                                                                                                                                                                                                |
| 6-261-G3                      | GCAGTAGGAAGGATGTCCTCGTGGT <b>GAC</b>                                                                                                                                                                                                                                                                                                                                                                                                                                                                                                                                                                                                                                      |
| 6-261-D1                      | GT <b> </b> ACCCCTTGGCTGGCTCCCATTGTCTG                                                                                                                                                                                                                                                                                                                                                                                                                                                                                                                                                                                                                                    |
| 6-261-D2                      | GATGTCCTCGTGGT <b> </b> ACCCCTTGGCTGGC                                                                                                                                                                                                                                                                                                                                                                                                                                                                                                                                                                                                                                    |
| <b>6-261-D3</b>               | <b>TGCAGTAGGAAGGATGTCCTCGTGGT<b> </b>AC<br/>CCGTGTCCACTACTATGTCTTACCAGCAGCNGGCCGCGGTGCCCGC<br/>GTGACGCTGGGGACCGGTCCGCAGCTGTCAGTGCTGGAGGTGNGCGCCT<br/>ACAAGCGCTGGCAGGACGTGTCCATGCGCCGCATGGAGATGATCAGTGA<br/>CTTCTGCGAGCGGCGCTTCTCAGCGAGGTGGATTACCTGGTGTGCGTGG<br/>ACGTGGACATGGAGNTCCGCGACCACGTGGGCGTGGAGATCCTGACTCC<br/>GCTGTTCGGCACCCCTGCACCCCGGCTTCTACGGAAGCAGCCGGGAGGCCT<br/>TCACCTACGAGCGCCGCCCCAGTCCCAGGCCTACATCCCCAAGGACGAG<br/>GGCGATTTCTACTAC<b>N</b>TGGGGGNGTTCTTCGGGGGGTTCGGTGAAGAGGT<br/>GCAGCGGCTCACCAGGGCCTGCCACCAGGCCATGATGGTTCGACCAGGCC<br/>AACGGCATCGAGGCCGTGTGGCACGACGAGAGCCACCTGAACAAGTACC<br/>TGCTGCGCCACAAACCCACCAAGGTGCTCTCCCCGAGTACTT<b>GTGG</b></b> |
| <b>Amplicon of Exon 7-796</b> |                                                                                                                                                                                                                                                                                                                                                                                                                                                                                                                                                                                                                                                                           |
| <b>ABO-7-T7-F1</b>            | <b>GAAATTAATACGACTCACTATAGGGCCGTGTCCACTACTATGTCTTACC</b>                                                                                                                                                                                                                                                                                                                                                                                                                                                                                                                                                                                                                  |
| ABO-7-T7-F2                   | GAAATTAATACGACTCACTATAGGGCCTGCCTTGCAGATACGTGG                                                                                                                                                                                                                                                                                                                                                                                                                                                                                                                                                                                                                             |
| ABO-7-T7-F3                   | GAAATTAATACGACTCACTATAGGGTCTAAGCCTTCCAATGGCCG                                                                                                                                                                                                                                                                                                                                                                                                                                                                                                                                                                                                                             |
| ABO-7-T7-F4                   | GAAATTAATACGACTCACTATAGGGGATGAAGTGAATCGCAGCCC                                                                                                                                                                                                                                                                                                                                                                                                                                                                                                                                                                                                                             |
| ABO-7-T7-F5                   | GAAATTAATACGACTCACTATAGGGCCTTACCTACGAGCGCC                                                                                                                                                                                                                                                                                                                                                                                                                                                                                                                                                                                                                                |
| ABO-7-T7-F6                   | GAAATTAATACGACTCACTATAGGGTGCTGCTCTAAGCCTTCCAAT                                                                                                                                                                                                                                                                                                                                                                                                                                                                                                                                                                                                                            |
| ABO-7-T7-F7                   | GAAATTAATACGACTCACTATAGGGGGCGTGGAGATCCTGACT                                                                                                                                                                                                                                                                                                                                                                                                                                                                                                                                                                                                                               |
| ABO-7-T7-F8                   | GAAATTAATACGACTCACTATAGGGATCCTGACTCCGCTGTTCG                                                                                                                                                                                                                                                                                                                                                                                                                                                                                                                                                                                                                              |

|                 |                                       |
|-----------------|---------------------------------------|
| <b>ABO-7-R1</b> | <b>CCACAAGTACTCGGGGGAG</b>            |
| ABO-7-R2        | TTG TTCAGGTGGCTCTCGTC                 |
| ABO-7-R3        | AGCACCTTGGTGGGTTTGTG                  |
| ABO-7-R4        | ACAACAGGACGGACAAAGGAAACAG             |
| ABO-7-R5        | ACTTG TTCAGGTGGCTCTCG                 |
| ABO-7-R6        | CACAAGTACTCGGGGGAGAG                  |
| ABO-7-R7        | CACAACAGGACGGACAAAGGA                 |
| ABO-7-R8        | TTCTGCTAAAACCAAGGGCG                  |
| <b>7-796-C1</b> | <b>CAAGGACGAGGGCGATTTCTACTACCTG</b>   |
| 7-796-C2        | CAAGGACGAGGGCGATTTCTACT <u>IC</u> CTG |
| 7-796-C3        | AGGACGAGGGCGATTTCTACTACCTGGG          |
| 7-796-A1        | CAAGGACGAGGGCGATTTCTACTACATG          |
| 7-796-A2        | CAAGGACGAGGGCGATTTCTACT <u>IC</u> ATG |
| <b>7-796-A3</b> | <b>AGGACGAGGGCGATTTCTACTACATGGG</b>   |
| FAM-Reporter    | FAM-UUUUU-BHQ1                        |

---

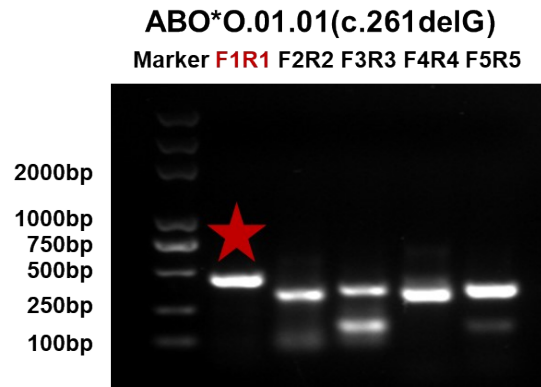

17

18 **Figure S1.** Five pairs of PCR primers were screened for ABO\*O.01.01(c.261delG)  
 19 locus, the best of which was F1R1.

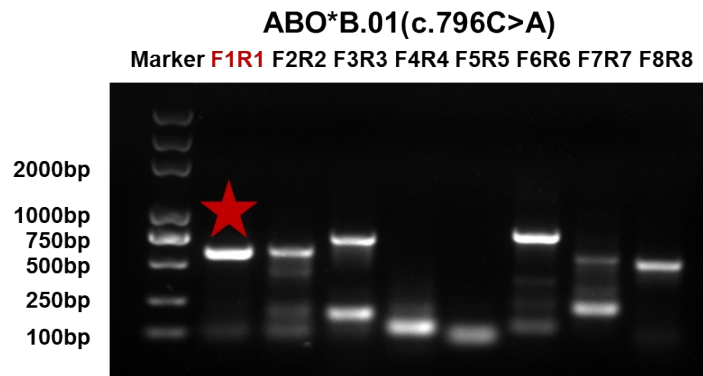

20

21 **Figure S2.** Eight pairs of PCR primers were screened for ABO\*B.01(c.796C>A) locus,  
 22 the best of which was F1R1.

23

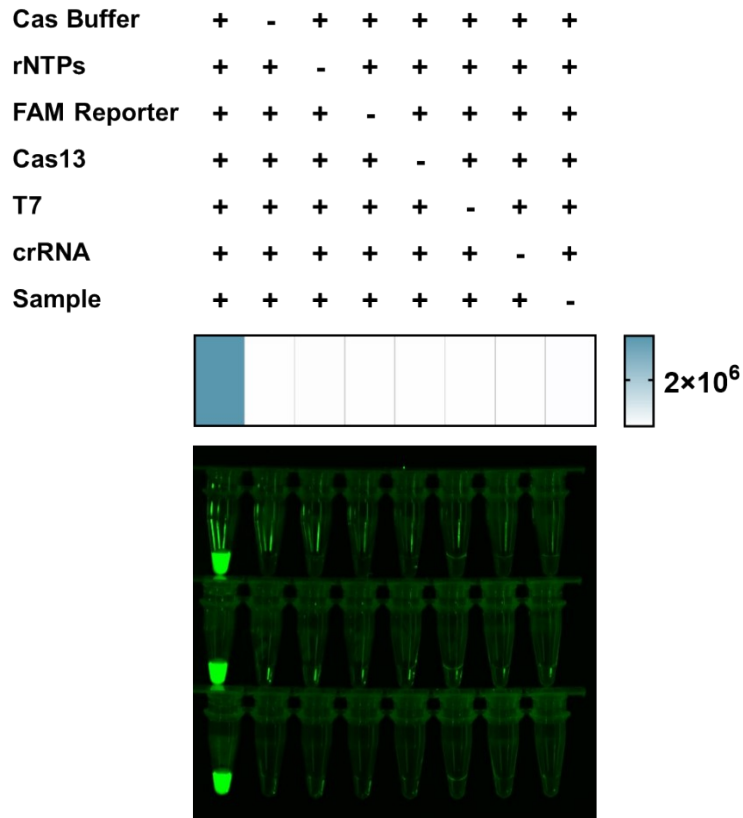

24

25 **Figure S3.** Verification of the effect of each component of the Cas13 trans-cleavage  
 26 activity showed that each component is indispensable.

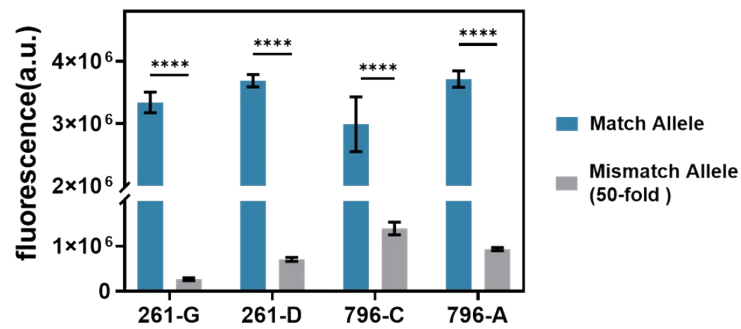

27

28 **Figure S4.** The discrimination capacity validation experiment. The four screened  
 29 crRNAs demonstrated good discrimination capacity in samples with matched  
 30 sequences and 50-fold concentrations of mismatched sequences with SNP.

31

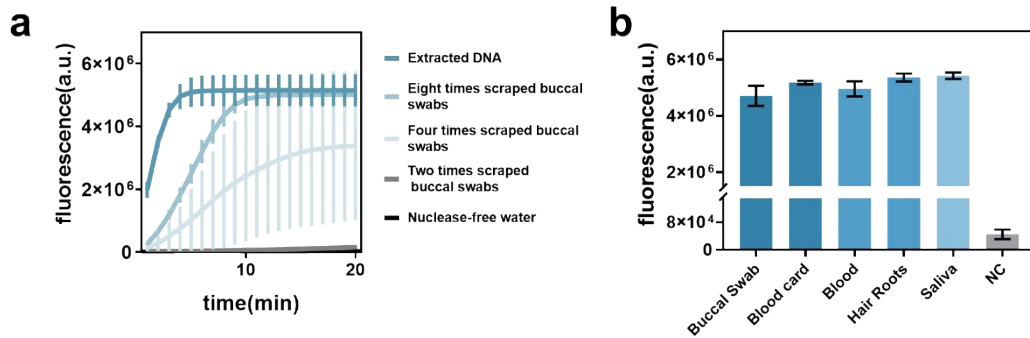

32  
 33 **Figure S5.** Extraction-free sample pretreatment was tested. (a) There is no significant  
 34 difference between positive control (extracted DNA) and directly treated buccal swabs  
 35 when scraped times outnumber eight. (b) Different samples including buccal swabs,  
 36 blood cards, peripheral blood, hair roots, and saliva tested show the adaptivity of the  
 37 method.

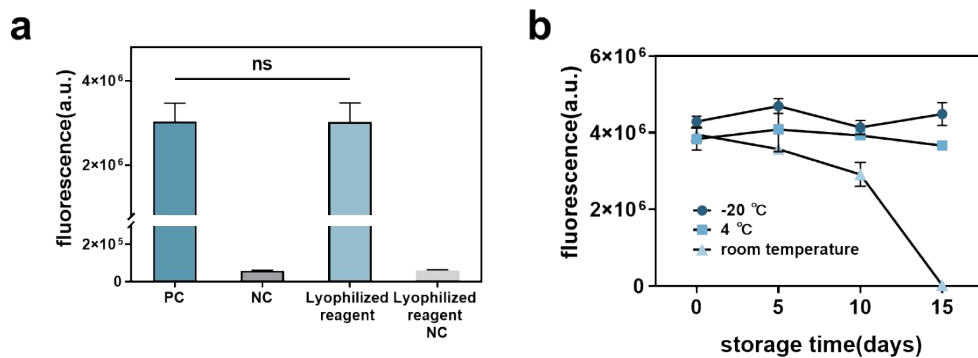

38  
 39 **Figure S6.** (a) Lyophilization reagent techniques were tested, which is also compatible  
 40 with this assay. (b) The end-point fluorescence intensity at 20 minutes using the  
 41 lyophilized reagents stored at  $-20\text{ }^{\circ}\text{C}$ ,  $4\text{ }^{\circ}\text{C}$ , and room temperature for 0, 5, 10, and 15  
 42 days.

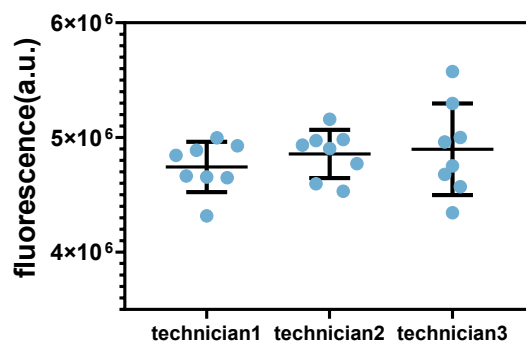

43  
 44 **Figure S7.** The reproducibility of our method was validated by three different lab  
 45 technicians conducting eight experiments.
